# Supplementary material for: Cost-of-illness analysis and regression modeling in cystic fibrosis: a retrospective prevalence-based study
Source: Springer Nature journal article supplement (doi:10.1007/s10198-015-0759-9), 2016-01-07
Supplement: MOESM1 [file 8773194]

**Appendix:**

**Figure A.1: Case selection flowchart**

*Legend:* pts. – Patients

**Figure A.2. Distribution of total costs for individual CF patients**

**
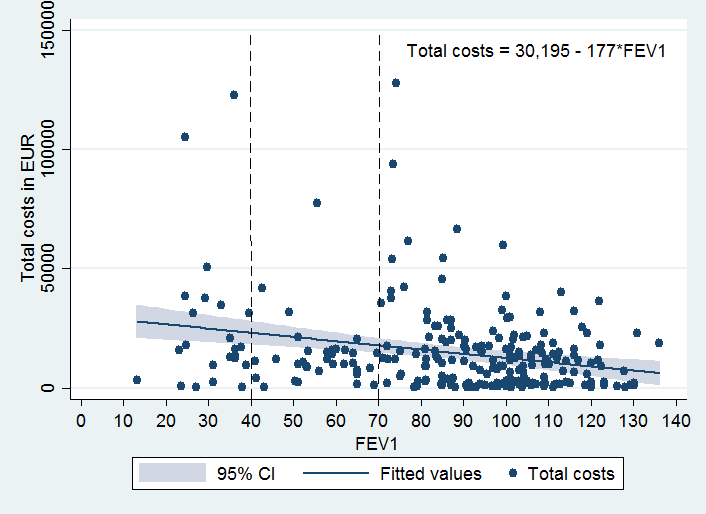
**

*Legend***:** FEV1 spirometric values (% predicted in children and adults [1,2])

References

[1] Zapletal A, Šamánek M, Paul T. Lung Function in Children and Adolescents. Methods, Reference Values. Prog. Respir. Res. Vol. 22, Karger, Basel, 1987. <http://www.karger.com/Book/Toc/221224>

[2] Miller MR, Hankinson J, Brusasco V et al. Standardisation of spirometry. Eur Respir J 2005; 26: 319-338. http://www.ersj.org.uk/content/26/2/319.full.pdf
